# Supplementary material
Source: Springer Nature journal article supplement (https://www.springermedizin.de/resource/supplementary/13014_2010_397_MOESM9_ESM.pdf/9633704)

**A**

GBM8

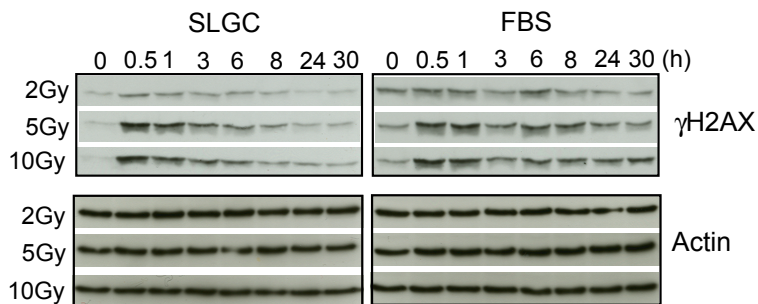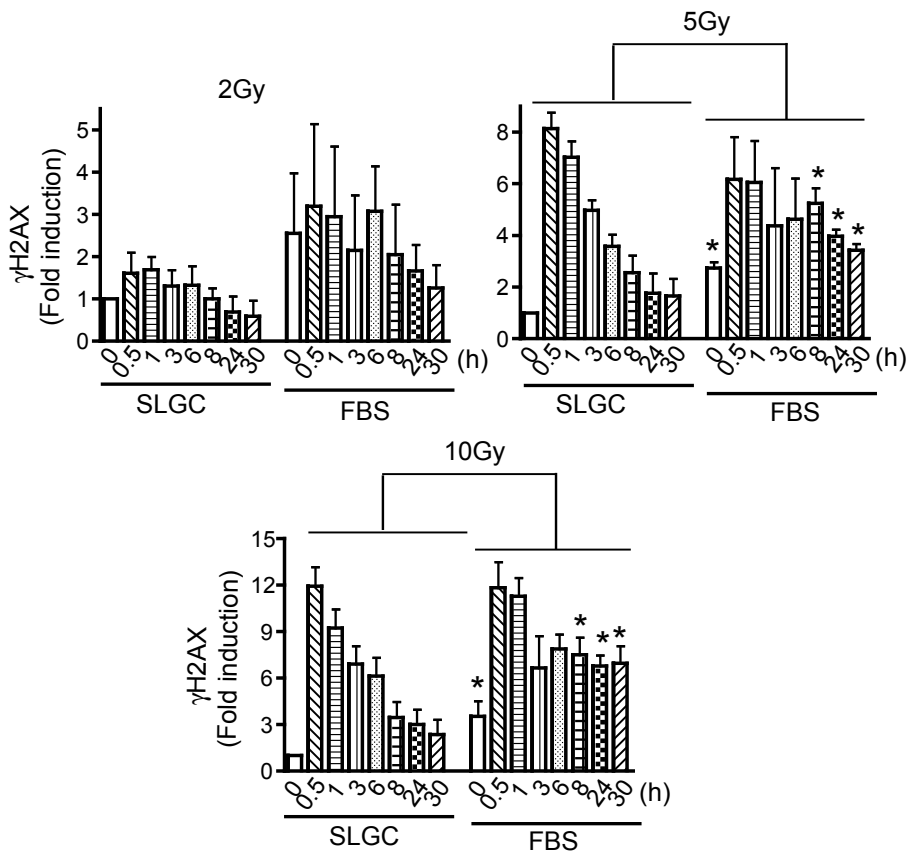**B**

SLGC 10Gy

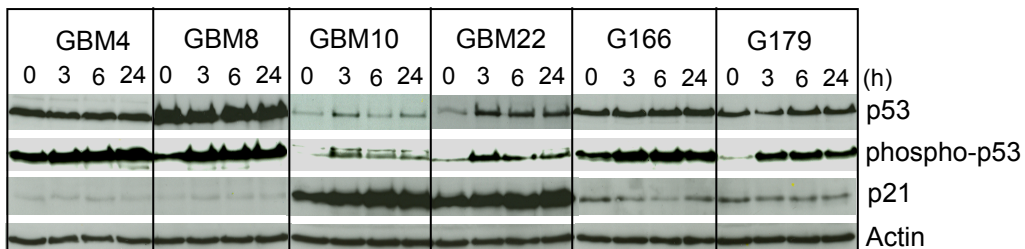

Supplement: MOESM9 [file 9633704]
